# Supplementary material for: Rational design of sandwich-like exfoliated nickel hydroxide–carbon nanotubes as a novel electrode for supercapacitors
Source: Royal Society of Chemistry journal article supplement (doi:10.1039/c6ra06966e), 2016-01-01
Supplement: c6ra06966e1.pdf [file c6ra06966e1.pdf]

## Supplementary Information

# **Rational design of sandwich-like exfoliated nickel hydroxide-carbon nanotubes as a novel electrode for supercapacitors**

Yang He <sup>a</sup> Huimin Zhu <sup>a</sup>, Qi Liu <sup>\*a</sup>, Jingyuan Liu <sup>a</sup>, Hongsen Zhang <sup>a</sup>, Rumin Li <sup>a</sup>, Zhanshuang Li <sup>a</sup>, and Jun Wang <sup>\*b</sup>

<sup>a</sup>Key Laboratory of Superlight Material and Surface Technology, Ministry of Education, Harbin Engineering University, 150001, P. R. China.

<sup>b</sup>Institute of Advanced Marine Materials, Harbin Engineering University, 150001, P. R. China

E-mail:zhqw1888@sohu.com Fax: +86 0451 8251 9303; Tel: +86 0451 8251 9303

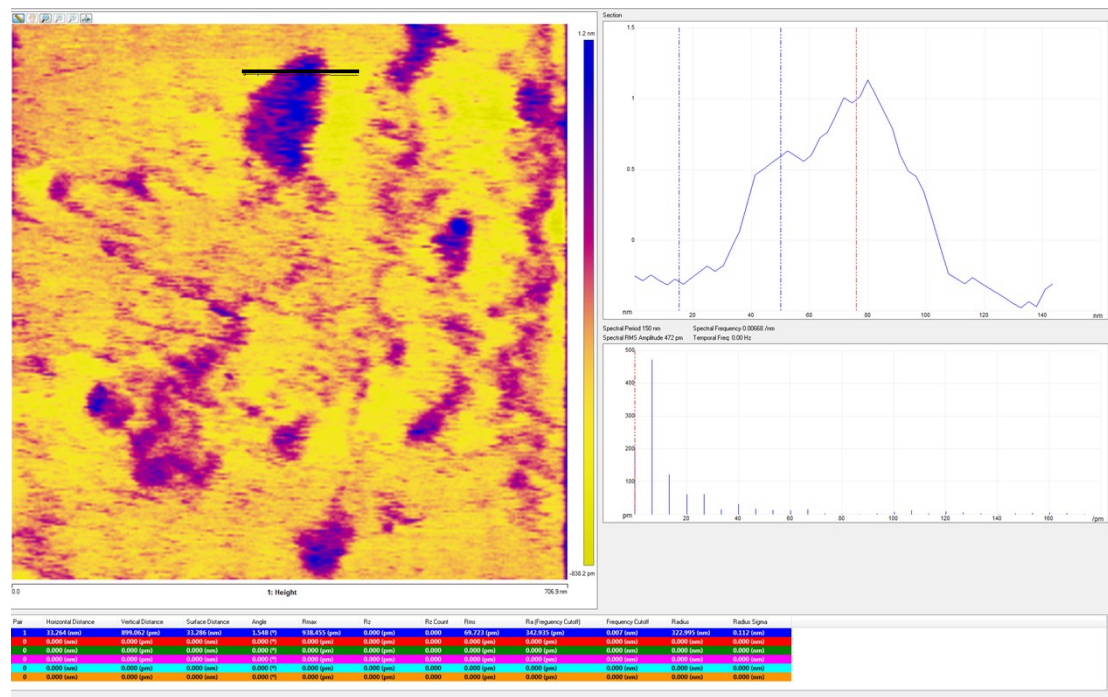

Fig.S1 AFM image of exfoliated Ni(OH)<sub>2</sub> nanosheets on a mica surface with the height profile

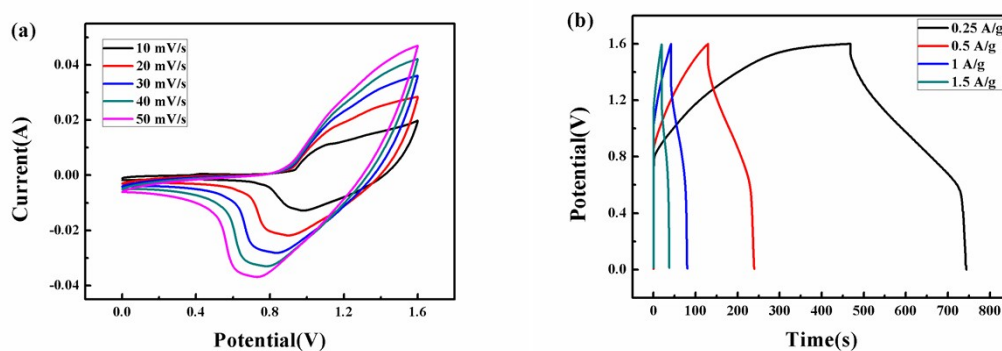

Fig.S2 (a) the cyclic voltammetry and (b) charge-discharge for 2 electrode supercapacitor measurements
